# Supplementary material for: Relationship between iron status markers and insulin resistance: an exploratory study in subjects with excess body weight
Source: PeerJ. 2020 Jul 31;8:e9528. doi: 10.7717/peerj.9528 (PMC7397981; doi:10.7717/peerj.9528)
Supplement: Table S1 [file peerj-08-9528-s001.xlsx]

## Sheet: Dietary_Data_REV2
Id. Subject	Sex (1, men; 2 woen)	Energy_(Kcal)	Protein_(g)	Carbohydrate_(g)	Fibre_(g)	Lipids_(g)	Cholesterol_(mg)	SFA_(g)	MUFA_(g)	PUFA_(g)	%SFA	%MUFA	%PUFA	Calcium_(mg)	Iron_(mg)	Vit_A_(mcg)	Vit_B1_(mg)	Vit_B2_(mg)	Folates_(mcg)	Vit_C_(mg)
1	2	1541	51.7	124	28.8	86.6	212	16.3	46	14.4	9.51979	26.8657	8.41012	648	9.3	750	0.91	1.2	259	190
2	1	1769	76.7	190	28.1	71.9	286	22.2	32.5	9.3	11.2945	16.5348	4.73149	1004	17	683	1.5	2	372	130
3	1	1896	79.1	188	21	84.8	318	28.9	32.6	15.4	13.7184	15.4747	7.31013	674	10.4	1125	0.89	1.8	314	217
4	2	1776	59.5	184	26.5	83.1	282	33.7	34.2	9.3	17.0777	17.3311	4.71284	755	12.2	644	1.1	1.5	380	108
5	1	2313	93.6	203	37.4	109	290	27.9	43.4	26.9	10.856	16.8872	10.4669	1276	16.8	1219	1.8	2.1	523	453
6	1	3011	127	256	39.9	126	383	42.4	56.3	16.6	12.6735	16.8283	4.96181	1315	23.1	884	2.4	2.8	536	375
7	2	1937	105	147	20.4	89.4	456	28.7	38.1	13.4	13.3351	17.7026	6.22612	452	21.2	567	1.6	2	365	202
8	1	2073	90.3	173	20.2	109	336	38.5	47.7	11.6	16.7149	20.7091	5.03618	920	14.5	652	2.5	2.2	236	119
10	1	2710	102	246	53.5	135	267	44.2	59.6	18.7	14.679	19.7934	6.21033	1280	20.3	1803	3.3	2.6	646	209
11	1	2551	126	265	16.3	106	328	36.8	38.9	15	12.9831	13.724	5.29204	1812	11.8	573	2.2	3.4	194	39
12	1	2508	112	242	23.6	103	466	44.7	36.7	11.2	16.0407	13.1699	4.01914	984	15.2	1179	1.3	1.8	297	201
13	1	1957	87.2	194	20.2	84.5	395	31.3	32.7	11.6	14.3945	15.0383	5.3347	1114	13.7	1210	1.2	2	331	95
14	2	1830	70.6	192	16.1	83	163	35.1	27.2	12.6	17.2623	13.377	6.19672	1289	10.4	744	2.9	2.2	285	125
15	1	1874	73.6	177	33.6	84.6	205	28.4	35	15	13.6393	16.809	7.20384	877	16.1	535	1.6	1.6	315	190
16	2	2473	72.3	275	40.5	112	301	37.4	49.6	15.2	13.611	18.051	5.53174	506	18.6	835	1.8	1.9	410	171
17	2	2551	92.6	195	18.3	119	292	42	48.6	18.3	14.8177	17.1462	6.45629	823	10.8	1282	1.1	2	276	138
18	2	1868	94.6	214	16.9	66.7	398	25.7	24.3	10.1	12.3822	11.7077	4.86617	718	12.7	1020	1.2	1.6	229	107
19	1	1938	69.3	181	13.9	97.2	316	30.2	39.7	15.3	14.0248	18.4365	7.10526	360	11	198	1.2	0.99	142	96.4
20	1	2232	98.9	193	17.9	114	522	38.9	48	18.6	15.6855	19.3548	7.5	1044	14.3	1087	1.2	1.7	278	117
21	1	1404	74	84.1	12	82.3	220	24.8	45.2	6.7	15.8974	28.9744	4.29487	585	9.5	1425	1	1	156	52
22	1	1728	107	118	14.1	89	358	34.6	37.7	7.6	18.0208	19.6354	3.95833	854	12.6	736	1.1	1.7	193	91.3
23	2	1466	70.8	163	31.9	52	128	17.1	20.3	8.7	10.498	12.4625	5.34106	600	16.1	660	1.4	1.2	262	138
24	1	1362	83.8	176	10	33.4	194	13.4	10.2	5.7	8.85463	6.74009	3.76652	542	6.9	174	0.64	1	142	92.2
25	1	1541	73.7	125	19.5	78.4	223	25.6	27.8	17.3	14.9513	16.2362	10.1038	530	10.3	608	1.3	1.3	199	55.3
26	2	960	33.4	130	12.5	30.9	61.9	12.4	10.5	5.7	11.625	9.84375	5.34375	541	8.6	538	1.1	1.7	166	73.9
27	1	1751	75.4	198	28.8	66.7	425	15.2	33.5	11	7.81268	17.2187	5.65391	557	15.6	601	1.1	1.4	263	104
28	1	2337	84.4	203	22.4	94.3	422	27.6	45.5	13.8	10.629	17.5225	5.31451	847	17.7	677	1.1	1.7	319	174
29	2	1928	79.5	210	33.3	75.5	283	29.5	29.1	8.3	13.7707	13.584	3.87448	809	18.9	2058	1.9	2.2	284	87.5
30	2	1572	60.1	169	23.4	67.6	139	19.6	32.1	10.4	11.2214	18.3779	5.9542	531	10.7	836	1.4	1.1	181	73.6
31	2	1186	42.9	137	13.7	48.8	226	17.4	21.1	6.3	13.204	16.0118	4.78078	383	6.9	513	0.54	0.78	174	72.5
32	1	1611	78.6	149	15.9	71.7	274	24.5	27.7	10.2	13.6872	15.4749	5.69832	859	9	550	1	1.7	158	45.4
33	1	1190	75.4	93.1	8.3	55.4	255	17.2	22.1	9.3	13.0084	16.7143	7.03361	420	7.4	197	1.2	1.4	93	10.8
34	2	1533	52.4	169	15.9	68.5	148	21.2	29.2	11	12.4462	17.1429	6.45793	911	11.8	397	1.1	1.7	171	78.5
35	2	1690	68.6	144	11.5	89.9	438	31.4	40.9	11.7	16.7219	21.7811	6.23077	299	10.6	555	1.6	1	179	68.2
36	2	824	40.3	79.1	6.8	35.4	237	10.3	12.7	9.1	11.25	13.8714	9.93932	148	5.5	306	1	1.5	115	28.8
37	2	2450	84.1	398	29.4	51.3	147	16.9	19.1	8.7	6.20816	7.01633	3.19592	566	14.4	398	1.4	0.85	387	415
38	1	1590	66	211	26.2	47.6	162	19.7	17.1	6.7	11.1509	9.67925	3.79245	965	17.9	NA	1.9	2.6	197	45.9
39	1	2332	81.8	261	28.3	100	351	25.2	54	12.7	9.72556	20.8405	4.90137	654	19.2	2402	1.4	2.3	343	118
40	2	999	37	127	16.2	31.9	209	10.5	11.9	6.3	9.45946	10.7207	5.67568	431	7.8	568	0.68	0.93	211	82
41	2	1875	96.9	219	19.6	62	339	25.9	20.2	10.2	12.432	9.696	4.896	817	14.6	449	2	2.7	287	143
43	2	460	47.7	35.2	7	12.6	293	5.2	2.9	2.2	10.1739	5.67391	4.30435	545	10	198	0.44	0.72	84.3	44.7
45	2	1243	40.3	137	17.3	55.6	129	15.1	24.6	11.3	10.9332	17.8117	8.18182	357	8.7	357	0.81	0.62	123	57.5
46	1	1980	90	246	50.3	59.7	169	19.4	26	8.2	8.81818	11.8182	3.72727	1290	22.1	1592	1.7	1.3	NA	NA
48	2	2994	135	289	47.3	135	446	50.8	39.5	26.3	15.2705	11.8737	7.90581	1007	22.3	759	2.4	2.8	274	232
49	1	3669	120	342	53.4	191	506	55.8	79.3	NA	NA	NA	NA	981	22.9	656	2.5	3	437	270
