# Supplementary material for: Relationship between iron status markers and insulin resistance: an exploratory study in subjects with excess body weight
Source: PeerJ. 2020 Jul 31;8:e9528. doi: 10.7717/peerj.9528 (PMC7397981; doi:10.7717/peerj.9528)
Supplement: Table S2 [file peerj-08-9528-s002.xlsx]

## Sheet: Analytical_data_REV2
Subject	Sex	GROUPTSAT	SubgroupPostprandial	Age	BMI_Kgm2	WHR	WHtR	BODYFAT	ABDOMINALFat	SBP_mmHg	DBP_mmHg	Hemoglobin_gdL	Hematocrit	MCV_fl	RDW	Iron_mcmolL	Ferritin_ngmL	Transferrin_gL	TSAT	TIBCmcmolL	sTfR_µgmL	GLUCOSE_mgdL	INSULIN_mcUmL	LEPTIN_ngmL	CHOLESTEROL_TOTAL_mgdL	LDL_CHOLESTEROL_mgdL	HDL_CHOLESTEROL_mgdL	TRIGLYCERID_mgdL	hsCRP_mgdL	HOMAIR	GLUCOSEAUC0120	INSULIN_AUC0120
37	2	NA	0	37	50.5476	0.935811	0.849693	51.25	44.15	109.5	82.75	NA	NA	NA	NA	NA	NA	NA	NA	NA	NA	103	NA	NA	156	78.5	59	94	1.886	NA	NA	NA
40	2	0	1	33	35.5095	0.954005	0.685241	46.55	45.85	108	80.75	12.45	37.65	80.685	13.65	7.518	80.35	3.385	8.86958	84.9635	1.1675	116.5	19.4813	52.108	173	83	65	124	NA	5.5829	15246	12992
20	1	0	1	39	25.2322	0.921657	0.513661	20.65	22.55	134	101.125	16.45	48.95	83.265	14.1	10.203	19.35	3.585	11.1524	89.9835	1.1525	92.5	6.61796	11.146	192	131.5	37	119	0.075	1.51049	12673.5	2249.27
35	2	0	0	28	25.4943	0.892438	0.55	28.3	22.9	101.5	74	12.75	39.3	88.88	13.6	9.7555	19.05	3.245	11.8652	81.4495	0.5575	82.5	10.3499	NA	208.5	109.5	51.5	235.5	0.0835	2.00668	NA	NA
21	1	0	1	49	38.8898	1.06141	0.691429	32.2	36.45	118.75	84.75	13.45	42	88.5	15.85	9.845	218.25	3.14	12.4079	78.814	1.8425	104.5	NA	30.929	222.5	126	35.5	306	0.905	6.26295	NA	NA
23	2	0	0	62	32.7344	1.00893	0.70625	41.3	37.3	130.5	85.5	12.3	38.8	89.2	13.7	11.098	15	3.07	14.4023	77.057	1.27	135	11.6772	NA	372	144	48	NA	0.383	3.89239	NA	NA
29	2	0	1	51	25.9472	0.892545	0.563253	35.45	32.65	122.75	88.5	14.85	45.95	96.555	13.3	12.53	27.25	3.45	14.4815	86.595	0.805	110.5	6.88874	NA	254	159	71	119.5	0.0495	1.87874	NA	NA
19	1	0	1	21	31.9378	0.978937	0.640244	30.8	33.6	116	86.75	15.8	46.95	89.255	13.6	11.814	143.7	2.745	17.0823	68.8995	0.9975	92	NA	22.669	156	98.5	36.5	106	0.355	5.24481	NA	NA
5	1	0	1	57	30.1881	1.03837	0.624277	29.05	33.2	124.25	74.25	15.15	45	97.14	13.45	13.5145	329.2	3.14	17.1487	78.814	1.1525	115	8.03658	12.4575	189	105.5	37	232	0.1315	2.29866	12928.5	4259.31
25	1	0	1	42	42.7011	0.959685	0.706647	40.1	43.35	122.75	83.75	15.05	46.6	89.46	12.95	12.0825	67.3	2.83	17.1508	71.033	0.7125	87	8.23318	41.991	240.5	176	43	106.5	0.375	1.77947	10800	7270.7
34	2	0	0	24	36.4483	0.895475	0.671598	50.1	51.4	99.25	70	13.45	39.9	87.785	13.05	11.7245	36.4	2.69	17.3299	67.519	0.74	90.5	5.26445	NA	141	82.5	42	81.5	1.128	1.19528	NA	NA
31	2	0	0	38	36.633	0.934426	0.730769	44.1	40.35	103.75	73	14.35	44	91.3	14.65	14.4095	25.5	3.22	17.8251	80.822	1.025	101.5	11.1483	NA	185	111.5	44.5	144.5	1.189	2.80419	NA	NA
12	1	0	1	42	27.9036	1.00253	0.554054	19.5	22.15	117.25	79	17.7	54.35	97.05	13.45	14.141	26.35	2.985	18.8688	74.9235	0.9275	98.5	6.34195	6.48618	201.5	117.5	42	210.5	0.6625	1.53686	11460	2029.62
14	2	0	1	19	27.0157	0.84305	0.53858	33.65	30.85	113.5	82.75	13.3	41.05	86.89	13.6	19.7795	22.9	4.07	19.0817	102.157	0.6475	92.5	7.02264	NA	208	115	64.5	143.5	0.815	1.61184	11434.5	1966.36
52	1	0	0	48	25.6234	1.0102	0.553073	21.6	24.9	120.5	81	14.7	45.3	85.47	16	2.11019	199.9	2.61	19.673	65.511	1.135	84	6.46917	NA	228	152	52	118	0.134	1.34175	NA	NA
50	1	0	0	38	25.9629	0.939394	0.505435	19.9	21.2	119.5	91	15.8	47.1	91.46	14.6	2.12791	166.5	2.69	19.8833	67.519	1.575	108	7.74879	NA	152	95	32	123	0.062	2.06634	NA	NA
44	1	1	0	44	37.826	1.05661	0.745399	38.4	39.8	117.5	84.25	15.25	46.1	90.515	14.25	11.1875	254.35	2.205	20.2165	55.3455	1.7725	113	7.4392	NA	191	123.5	35	163	0.2475	2.05846	NA	NA
2	1	1	1	50	32.0327	1.01125	0.627717	31.75	34.95	110	86	16.95	49.15	85.825	13.5	15.8415	321.2	3.095	20.3778	77.6845	0.82125	79.5	10.2575	22.4143	231	160	39	161.5	0.1715	2.02158	12000	12570.2
32	1	1	0	42	32.3232	1.06942	0.657576	29.4	32.75	105.5	76.25	15.55	46.35	91.9	13.4	13.8725	159.95	2.525	21.7527	63.3775	1.025	101.5	6.00056	NA	208.5	140	42.5	131	0.435	1.50591	NA	NA
11	1	1	1	53	37.9431	1.04811	0.725758	34.85	38.7	146.5	91.5	15.9	47	93.475	13.2	16.826	167.6	3.11	21.8618	78.061	0.9625	105.5	14.5534	32.8804	199.5	110	67.5	109	0.689	3.79019	18290	10272.5
4	2	1	1	48	29.4854	0.875888	0.573795	42.1	40.8	134	85.25	14.25	43.35	90.9	12.75	18.974	13.6	3.405	22.0699	85.4655	0.6575	84.5	7.58999	33.7349	202.5	130	43.5	145	0.12	1.57811	11760	3394.95
27	1	1	0	35	28.5464	0.995283	0.57027	28.45	31.45	125.5	88.25	15.3	47.6	83.505	13.45	15.931	148.3	2.85	22.2957	71.535	0.735	98	5.28898	NA	179	109	54.5	77	0.4895	1.2798	NA	NA
36	2	1	0	31	26.5122	0.871593	0.573248	35.7	32.15	96.5	69.5	13.85	41	94.365	12.9	16.5575	27.55	2.96	22.5222	74.296	0.71	83.5	4.71821	NA	160.5	101	39.5	100	0.0565	0.974708	NA	NA
51	2	1	0	44	35.4679	0.859375	0.650888	51	51.7	114	92	15.5	46.8	97.1	14	2.27404	87.1	3.26	22.9695	81.826	0.81	101	8.84985	NA	221	140	53	140	0.292	2.207	NA	NA
49	1	1	0	54	25.3714	1.02103	0.555714	21.7	23.75	115	81.5	16.3	47.8	88.525	13.3	16.468	224.5	2.84	23.1947	71.284	1.0075	97.5	3.20135	NA	195.5	109.5	32	269.5	0.0925	0.744769	NA	NA
1	2	1	1	57	25.0863	0.922251	0.570513	33.25	29.3	124.75	80.5	15.9	47.95	94.94	12.75	16.468	249.6	2.815	23.2544	70.6565	0.97775	92.5	7.58215	25.5444	246	152	43.5	253.5	0.633	1.69817	14016	11246.4
33	1	1	0	52	29.7527	1.01649	0.627193	33.45	36.25	118.75	85	15.5	45.3	91.335	13.4	18.079	126.7	3.09	23.265	77.559	0.97125	109	5.23377	NA	245.5	170.5	41.5	168.5	0.0855	1.4194	NA	NA
26	2	1	0	44	26.4626	0.867682	0.556604	35.2	31.5	140	97.25	13.95	44.75	74.68	13.35	17.0945	39.85	2.93	23.3365	73.543	0.81375	99.5	3.88579	38.097	201	134.5	48.5	88.5	0.0285	1.01379	12566	1954.37
7	2	1	1	54	33.6133	0.877232	0.614062	40.9	36.1	135	94	14.05	43.35	93.765	12.8	19.4215	80.8	3.31	23.4345	83.081	0.57625	103	6.46424	62.5833	245	152	59.5	169.5	0.223	1.64054	17019	1560.66
6	1	1	1	41	25.5634	0.987374	0.562865	23.3	25.85	99	62.25	16.75	49.05	94.135	12.3	15.6625	306.35	2.555	24.694	64.1305	0.675	93.5	8.39166	16.0206	211.5	139.5	45	135.5	0.0175	1.93621	11616	6438.7
46	1	1	0	53	31.8587	1.01578	0.653179	21.8	24.05	151.25	98.25	15.7	47	84.23	13.05	16.3785	80.4	2.635	24.8419	66.1385	1.01125	102	4.38753	NA	161.5	93.5	60.5	38.5	0.0395	1.14906	NA	NA
39	1	1	0	49	29.743	0.962435	0.58046	28.6	31.65	123.5	80	15.2	45.5	92.51	12.95	18.3475	254.85	2.87	25.4477	72.037	1.05	99	4.56082	NA	226	155.5	50.5	100.5	0.037	1.13296	NA	NA
8	1	1	1	25	27.8887	0.891414	0.531627	18.8	20.95	134	80.5	15.95	47.35	90.325	12.3	16.647	100.55	2.615	25.4798	65.6365	1.21	93	7.54363	5.05236	204.5	102.5	38.5	318.5	0.013	1.74238	12720	2370.95
3	1	1	1	54	25.4685	1.04135	0.57622	26.9	28	121.5	82	18.5	56.75	90.53	13.9	18.437	86.05	2.895	25.5872	72.6645	1.37	102.5	6.48676	10.7645	248	163.5	51	168	0.114	1.62491	9877	3068.56
16	2	1	1	46	28.9578	0.838257	0.546348	37.4	36.25	95.5	69.75	13.85	41.7	85.565	12.25	15.215	34.7	2.365	25.634	59.3615	0.7325	89	5.31592	22.478	164.5	100.5	49.5	73	0.045	1.17384	11562	816.075
15	1	1	1	59	28.1846	1.0572	0.59691	25.9	26.5	124.335	93.835	16.1	48.2	88.82	12.7	18.258	89.7	2.825	25.6498	70.9075	0.98625	113	7.71245	7.525	166	83	35.5	237.5	0.1335	2.15719	11468	1406.87
13	1	1	1	44	37.4021	1.00408	0.714286	32.4	32.6	118.5	85	14.7	43.8	90.525	13.3	18.3475	135.9	2.755	26.5912	69.1505	0.95	107.5	8.6449	32.2595	223	138	43.5	206	0.228	2.27482	13612.5	2560.85
17	2	1	1	56	28.7775	0.903578	0.628049	40.35	37.6	120.75	82.5	14.65	45.3	95.98	13.75	22.554	56.4	3.31	26.9853	83.081	0.72875	98	5.5575	28.153	288.5	191.5	58	195	0.6445	1.35409	13744.5	1066.48
18	2	1	1	30	30.4752	0.856061	0.566761	40.95	39.75	100	67.75	14.5	44	86.25	13.4	19.7795	26.35	2.87	27.5351	72.037	0.935	97	9.9629	33.359	189.5	130.5	39.5	96.5	0.676	2.41169	11340	4290.95
22	1	1	1	22	28.3394	0.868254	0.494652	20.4	21.7	121.75	74.25	14.8	45.9	92.44	13.5	16.647	200.95	2.395	27.8257	60.1145	0.96375	95.5	5.98257	6.705	135.5	70	53.5	59	0.015	1.41333	10440	904.777
48	2	1	0	49	25.5588	0.763273	0.490385	29.85	25.2	122.75	86.5	13.25	39.65	92.05	12.95	20.943	15.45	2.915	28.2021	73.1665	1.215	102.5	5.19345	NA	161	87	61.5	62	0.332	1.32438	NA	NA
38	1	1	0	33	30.4456	0.91803	0.559459	28.05	29.7	110	78.75	16.35	47.95	85.03	12.65	15.4835	330.3	2.18	28.278	54.718	0.8825	84.5	8.78649	NA	137.5	59	29.5	244	0.1625	1.82219	NA	NA
24	1	1	1	22	29.8484	0.941425	0.588757	24.05	25.25	120	78.25	15.1	45.5	87.165	13.55	20.1375	88.95	2.75	29.1656	69.025	0.92625	96	6.24307	7.067	187	123.5	47.5	79.5	0.2365	1.48177	9740.5	1914.74
30	2	1	0	31	32.9692	0.923264	0.64759	43.7	43.15	93.25	69	13.8	42.15	96.915	12.7	21.0325	30.85	2.81	29.831	70.531	0.90125	88.5	5.17116	NA	163	96.5	51	76.5	0.223	1.12878	NA	NA
45	2	1	0	43	24.9324	0.809015	0.525806	27.2	21.1	109	77.5	14.7	43.8	90.215	12.6	19.6005	70.75	2.525	31.1272	63.3775	0.9725	87	4.44931	NA	174	108	44.5	108.5	0.019	0.932697	NA	NA
10	1	1	1	37	28.4775	0.97381	0.592647	27.8	30.85	113.835	80.4	14.95	45.4	93.055	13.05	23.091	72.95	2.835	32.1932	71.1585	0.5625	101	5.42714	14.4794	218.5	142.5	60	79.5	0.2315	1.35927	10531.5	1062.63
28	1	1	0	42	30.1524	1.04531	0.596591	18.9	20.05	111	79.25	15.85	48.2	94.465	13.9	24.165	162.9	2.915	33.0086	73.1665	0.7125	102	4.4111	NA	224.5	137	48.5	194.5	0.006	1.10548	NA	NA
41	2	1	0	65	27.3014	0.871287	0.582781	35.25	29.95	119.75	73	14.35	43	91.89	13.15	21.301	106.8	2.44	34.6581	61.244	0.64375	103	4.5493	NA	216.5	123	81	64	0.334	1.17352	NA	NA
43	2	1	0	50	45.0612	0.793919	0.671429	53	52.05	138.375	105.25	14	41.65	99.96	13.1	31.146	115.3	3.195	38.7095	80.1945	0.7475	96	3.91253	NA	259.5	161	65	168	0.3395	0.94437	NA	NA
