# Supplementary material for: Relationship between iron status markers and insulin resistance: an exploratory study in subjects with excess body weight
Source: PeerJ. 2020 Jul 31;8:e9528. doi: 10.7717/peerj.9528 (PMC7397981; doi:10.7717/peerj.9528)
Supplement: Table S3 [file peerj-08-9528-s003.xlsx]

## Sheet: Hoja1
Supplementary Table 1
Field	Label	Meaning
Sex	1	Male
Sex	2	Female
Supplementary Table 2
Field	Label	Meaning
Sex	1	Male
Sex	2	Female
GROPUTSAT	0	TSAT value <20%
GROPUTSAT	1	TSAT value 20%
SubgroupPostprandial	0	No postprandial variables
SubgroupPostprandial	1	Postprandial variables
TSAT, transferrin saturation
